# Supplementary material for: Phosphorus-triggered modification of the electronic structure and surface properties of Pd4S nanowires for robust hydrogen evolution electrocatalysis
Source: Royal Society of Chemistry journal article supplement (doi:10.1039/d0ta07403a), 2020-01-01
Supplement: d0ta07403a1.pdf [file d0ta07403a1.pdf]

### Electronic Supplementary Information

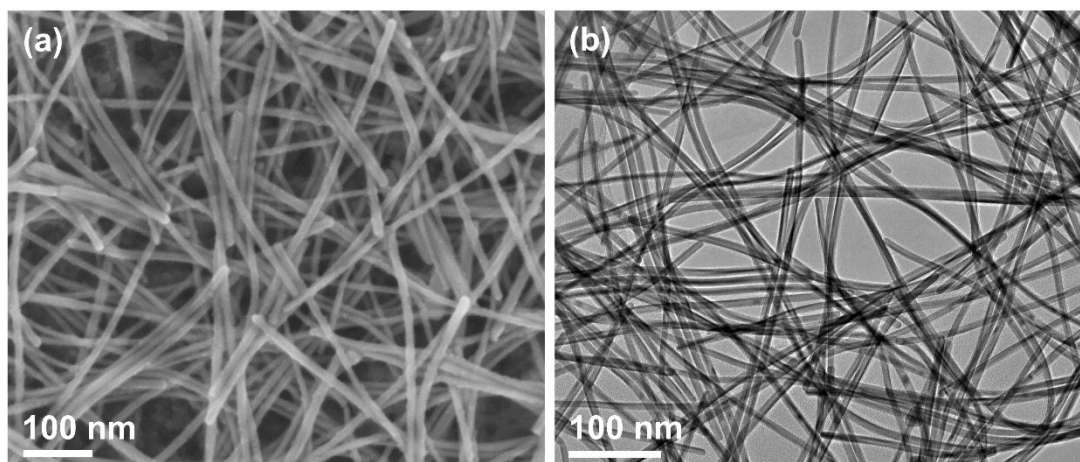

**Fig. S1** (a) SEM and (b) TEM images of Pd NWs.

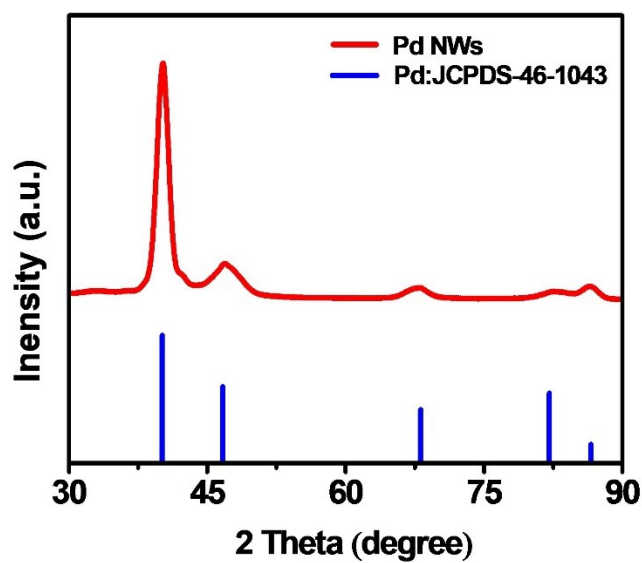

**Fig. S2** XRD pattern of the Pd NWs.

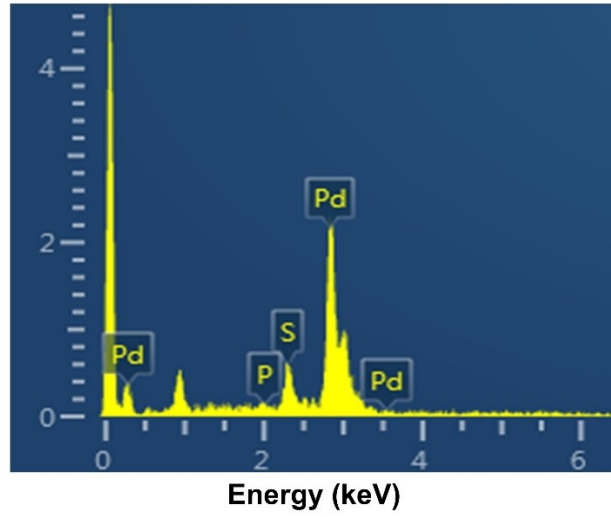

**Fig. S3** EDX spectrum of P-Pd<sub>4</sub>S NWs.

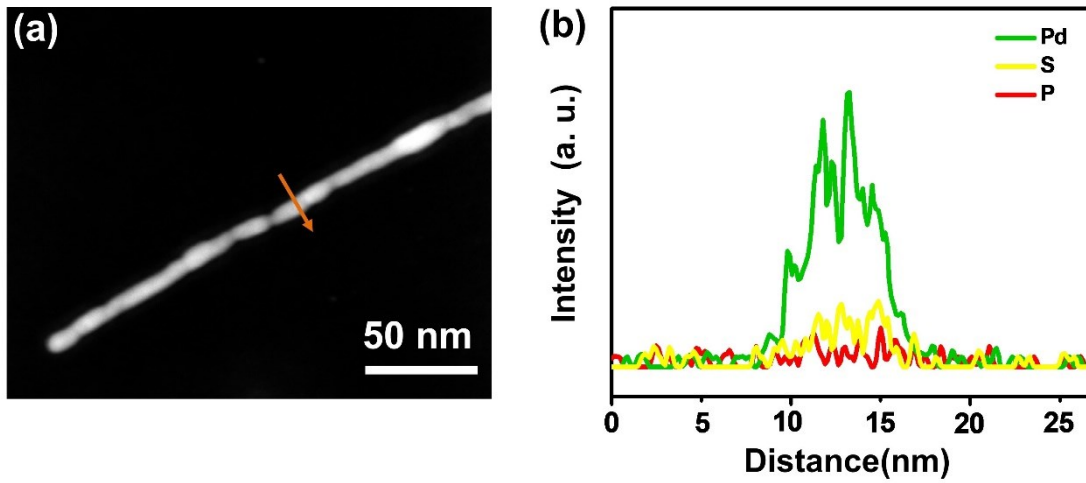

**Fig. S4** (a) HAADF-STEM image and (b) corresponding EDX line scanning profile of P-Pd<sub>4</sub>S NWs.

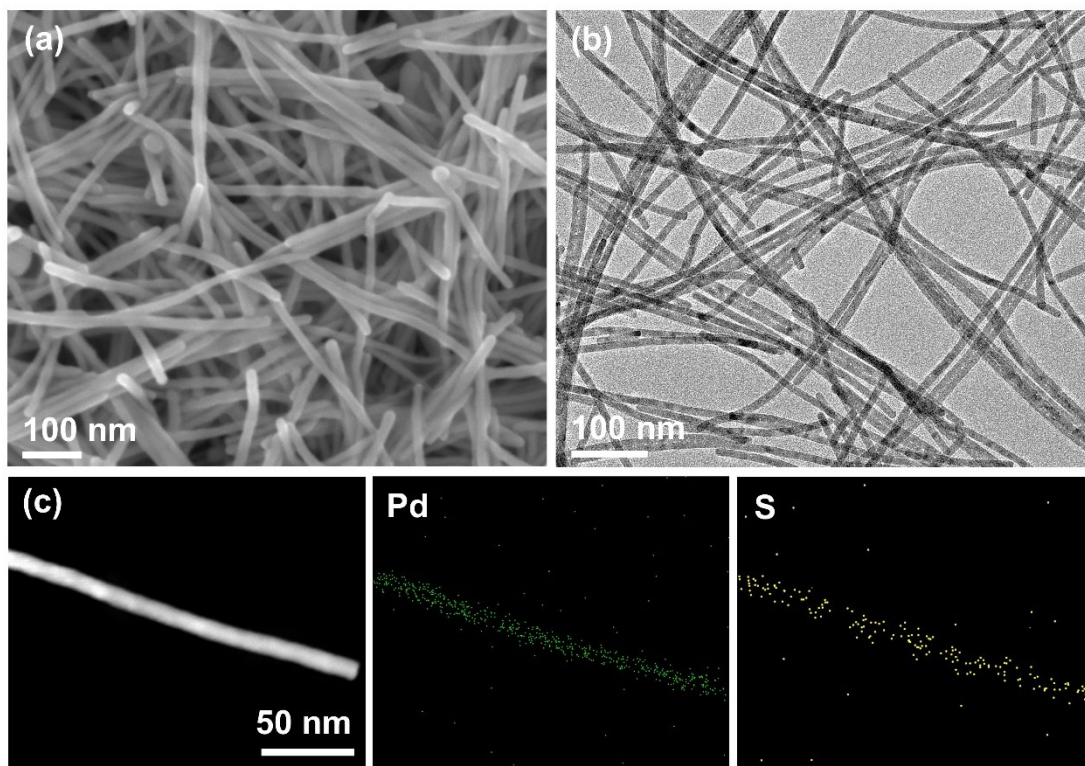

**Fig. S5** (a) SEM image, (b) TEM image, (c) HAADF-STEM image and the corresponding elemental mapping of the Pd<sub>4</sub>S NWs.

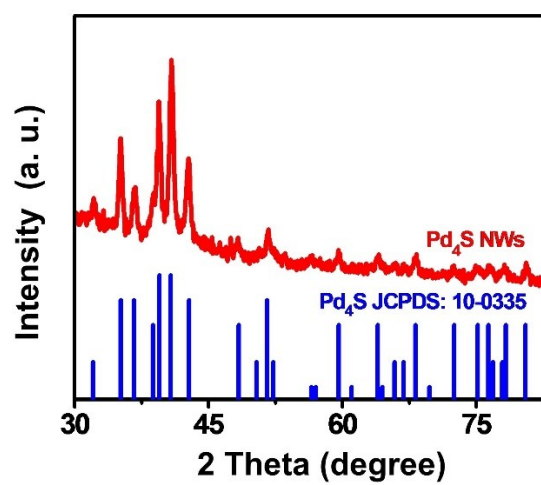

**Fig. S6** XRD pattern of the Pd<sub>4</sub>S NWs.

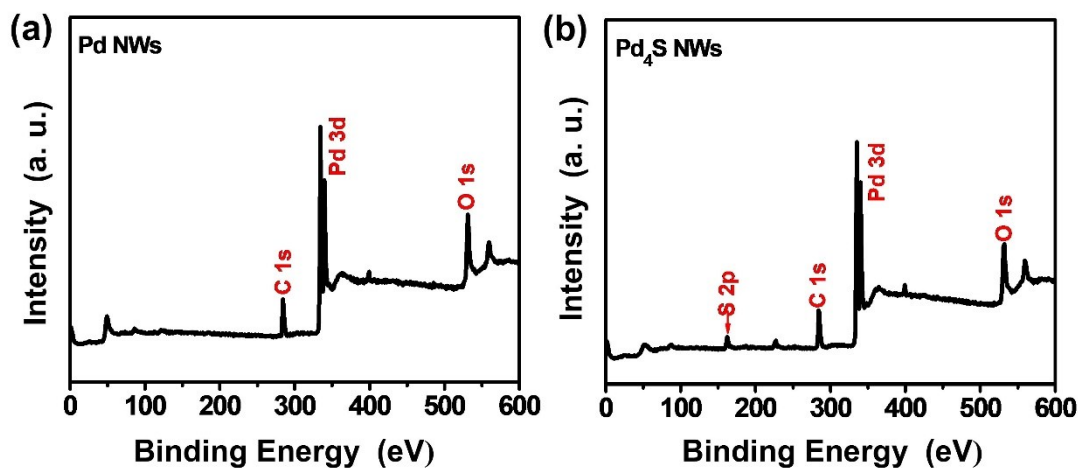

Fig. S7 XPS survey spectra of the Pd NWs (a) and Pd<sub>4</sub>S NWs (b).

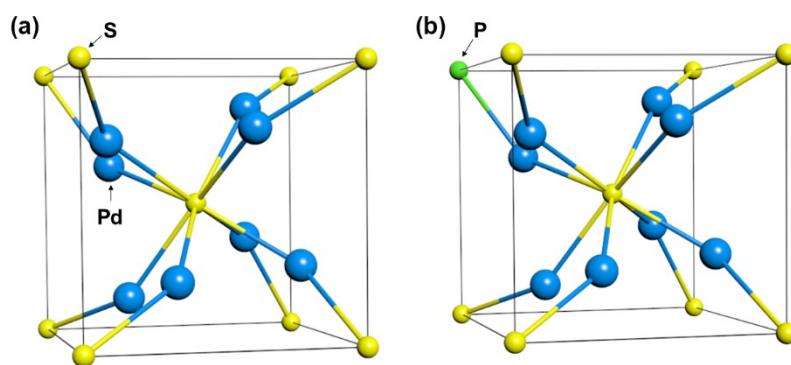

Fig. S8 The unit cells of (a)Pd<sub>4</sub>S and (b)P-Pd<sub>4</sub>S.

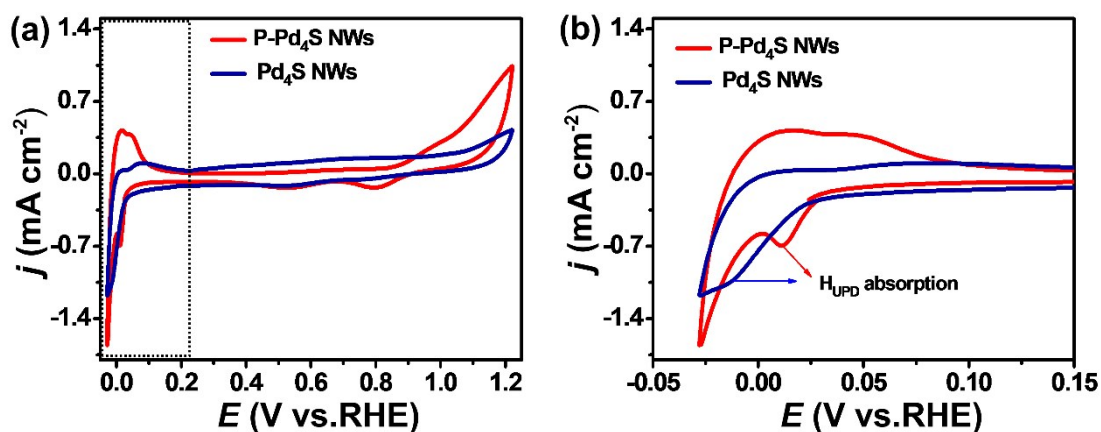

Fig. S9 (a) CV curves for the Pd<sub>4</sub>S NWs and P-Pd<sub>4</sub>S NWs recorded in 0.5 M H<sub>2</sub>SO<sub>4</sub> with a scan rate of 50 mV s<sup>-1</sup>. (b) The regions between -0.05 and 0.15 V from (a).

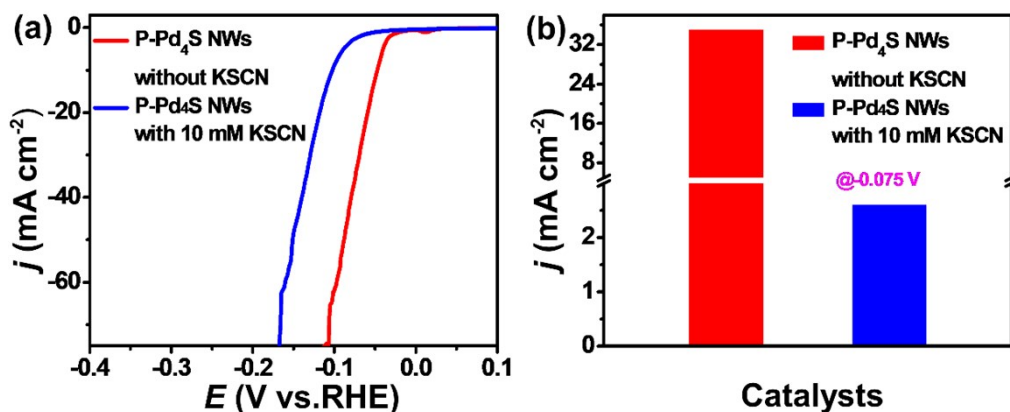

**Fig. S10** (a) LSV HER curves of the P-Pd<sub>4</sub>S NWs with or without 10 mM KSCN in 0.5 M H<sub>2</sub>SO<sub>4</sub>. (b) The comparison of the cathodic current densities of the P-Pd<sub>4</sub>S NWs with or without 10 mM KSCN in 0.5 M H<sub>2</sub>SO<sub>4</sub> at -0.075 V (vs. RHE).

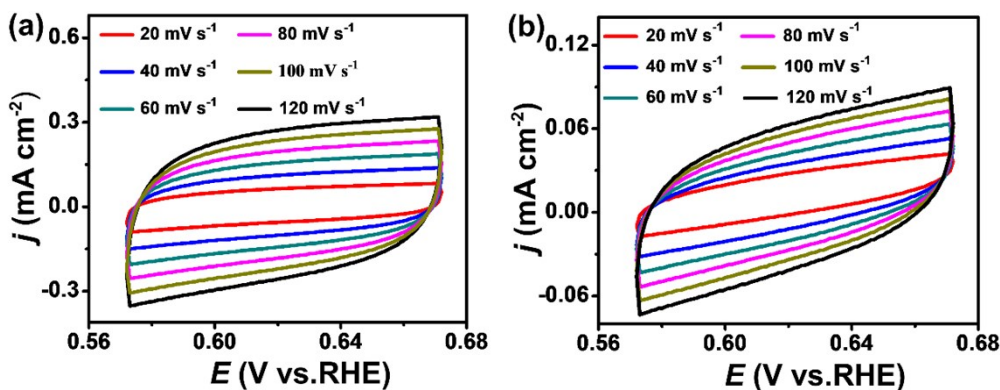

**Fig. S11** CV curves with different scan rates for P-Pd<sub>4</sub>S NWs (a) and Pd<sub>4</sub>S NWs (b).

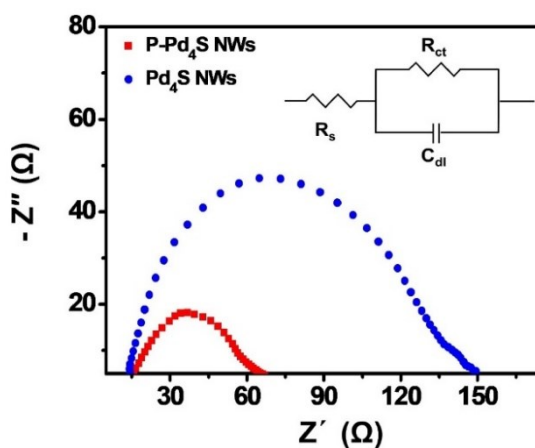

**Fig. S12** Electrochemical impedance spectra (EIS) of P-Pd<sub>4</sub>S NWs and Pd<sub>4</sub>S NWs at 300 mV overpotential.



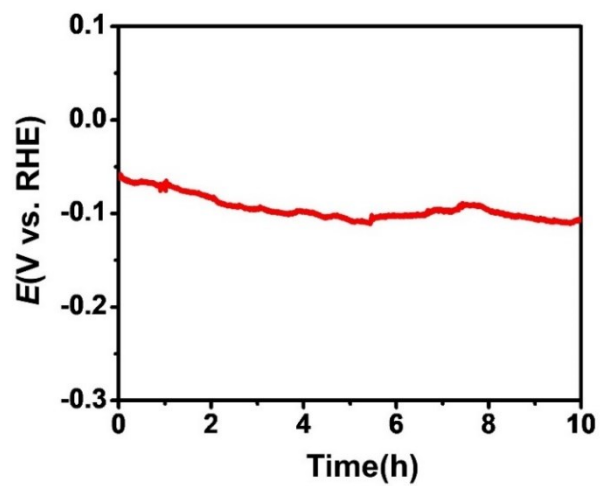

**Fig. S13** V-t curve recorded at a current of  $10 \text{ mA cm}^{-2}$  for Pt/C.

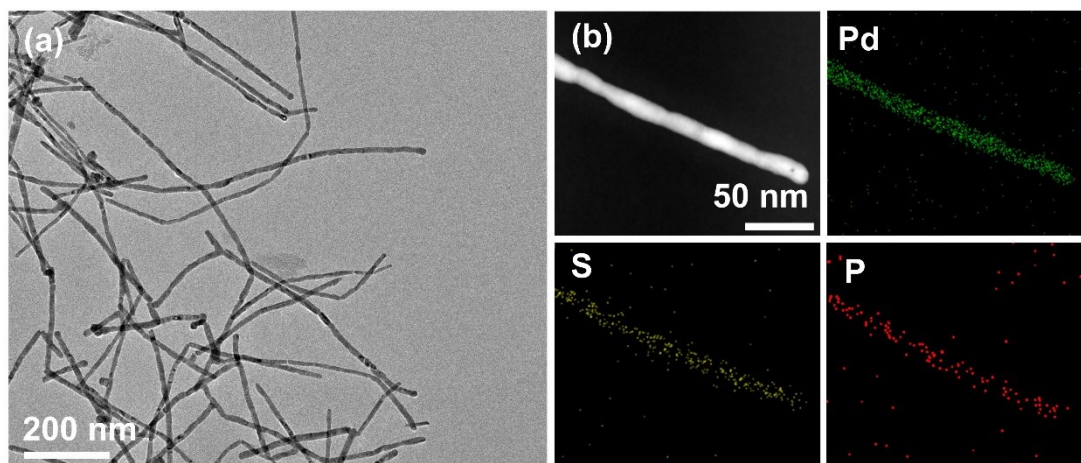

**Fig. S14** (a) TEM image and (b) HAADF-STEM and the corresponding elemental mapping of the P-Pd<sub>4</sub>S NWs after HER stability testing.

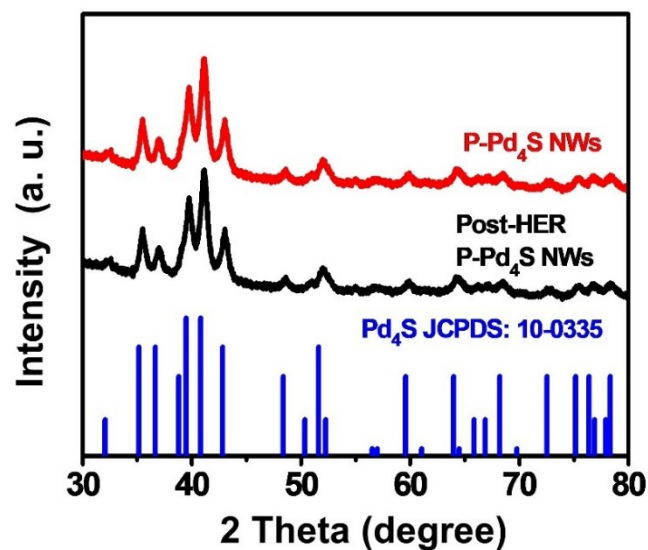

Fig. S15 XRD patterns of the fresh and post-HER P-Pd<sub>4</sub>S NWs.

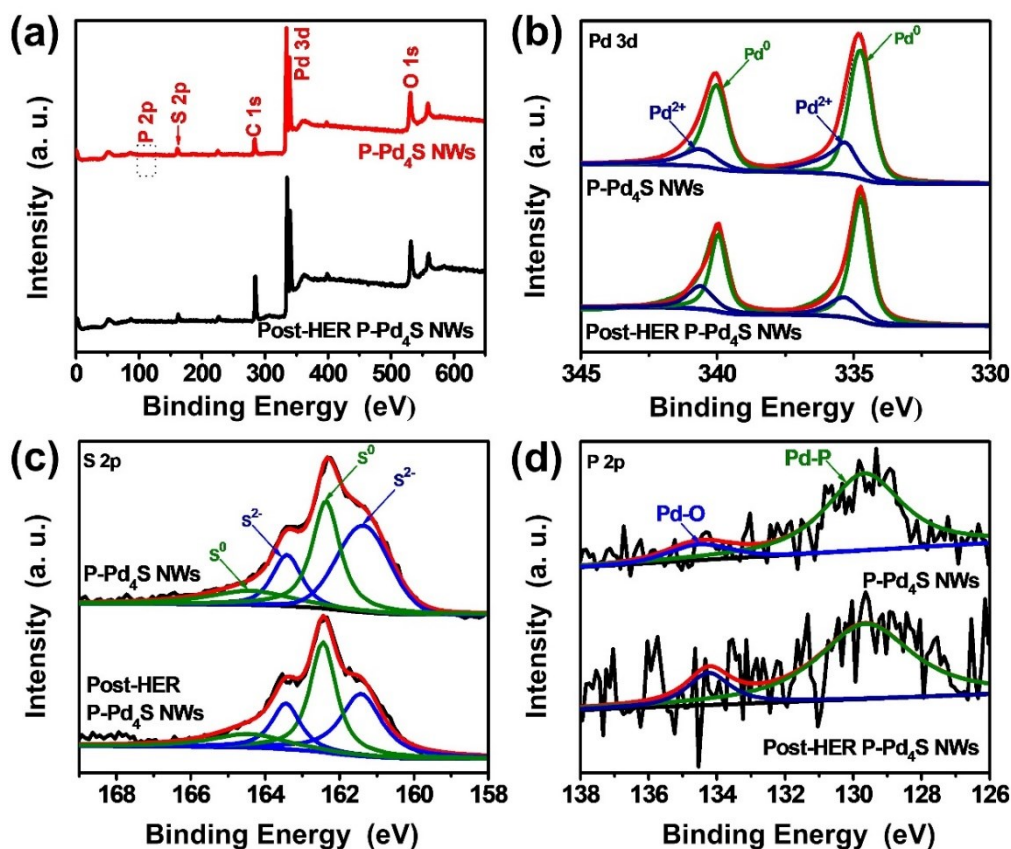

Fig. S16 (a) XPS survey spectra, (b) high-resolution Pd 3d XPS spectra, (c) high-resolution S 2p XPS spectra, (d) high-resolution P 2p spectra of the fresh and post-HER P-Pd<sub>4</sub>S NWs.

**Table S1.** Comparison of HER activity for the P-Pd<sub>4</sub>S NWs and some other reported non-Pt-based electrocatalysts.

| Catalyst                                                               | Overpotential at -<br>10 mA cm <sup>-2</sup> (mV) | Tafel slop<br>(mV dec <sup>-1</sup> ) | Electrolyte                              | Ref.             |
|------------------------------------------------------------------------|---------------------------------------------------|---------------------------------------|------------------------------------------|------------------|
| <b>P-Pd<sub>4</sub>S NWs</b>                                           | <b>47</b>                                         | <b>32.7</b>                           | <b>0.5 M H<sub>2</sub>SO<sub>4</sub></b> | <b>This work</b> |
| Ni <sub>1.4</sub> (Fe <sub>0.6</sub> )P@Al <sub>2</sub> O <sub>3</sub> | 53                                                | 38                                    | 0.5 M H <sub>2</sub> SO <sub>4</sub>     | 1                |
| Rh <sub>3</sub> Pb <sub>2</sub> S <sub>2</sub> /C                      | 87.3                                              | 45.6                                  | 0.5 M H <sub>2</sub> SO <sub>4</sub>     | 2                |
| MoP@NCF                                                                | 121.8                                             | 627                                   | 0.5 M H <sub>2</sub> SO <sub>4</sub>     | 3                |
| Ru <sub>2</sub> P nanoparticles                                        | 55                                                | 34.1                                  | 0.5 M H <sub>2</sub> SO <sub>4</sub>     | 4                |
| P-CoTe <sub>2</sub> /C<br>nanoparticles                                | 159                                               | 64.62                                 | 0.5 M H <sub>2</sub> SO <sub>4</sub>     | 5                |
| Pd <sub>3</sub> P <sub>2</sub> S <sub>8</sub>                          | 52                                                | 29                                    | 0.5 M H <sub>2</sub> SO <sub>4</sub>     | 6                |
| P-Fe <sub>3</sub> O <sub>4</sub> @3DG                                  | 65                                                | 50.2                                  | 0.5 M H <sub>2</sub> SO <sub>4</sub>     | 7                |
| P-MoS <sub>2</sub>                                                     | 118                                               | 52                                    | 0.5 M H <sub>2</sub> SO <sub>4</sub>     | 8                |
| MoC <sub>x</sub> /C                                                    | 50                                                | 62                                    | 0.5 M H <sub>2</sub> SO <sub>4</sub>     | 9                |
| CoP/NPC/TF                                                             | 91                                                | 54                                    | 0.5 M H <sub>2</sub> SO <sub>4</sub>     | 10               |
| Ni <sub>3</sub> (VO <sub>4</sub> ) <sub>2</sub>                        | 90                                                | 50                                    | 0.5 M H <sub>2</sub> SO <sub>4</sub>     | 11               |
| MoP@NC                                                                 | 135                                               | 57                                    | 0.5 M H <sub>2</sub> SO <sub>4</sub>     | 12               |
| CoP/NiCoP                                                              | 60                                                | 64                                    | 0.5 M H <sub>2</sub> SO <sub>4</sub>     | 13               |
| Pd-CoS <sub>2</sub> -MoS <sub>2</sub> /C-600                           | 144                                               | 59.9                                  | 0.5 M H <sub>2</sub> SO <sub>4</sub>     | 14               |
| Al-NiP <sub>2</sub> NSs/CFP                                            | 58                                                | 46                                    | 0.5 M H <sub>2</sub> SO <sub>4</sub>     | 15               |



## References

- [1] J. Xu, Z. Liu, Z. Wei, S. Zhang, C. Guo and M. He, *Electrochim. Acta*, 2020, **349**, 136417.
- [2] T. Kim, J. Park, H. Jin, A. Oh, H. Baik, S. H. Joo and K. Lee, *Nanoscale*, 2018, **10**, 9845-9850.
- [3] X. Huang, X. Wang, P. Jiang, K. Lan, J. Qin, L. Gong, K. Wang, M. Yang, L. Ma and R. Li, *Inorg. Chem. Front.*, 2019, **6**, 1482-1489.
- [4] Y. Wang, Z. Liu, H. Liu, N. T. Suen, X. Yu and L. Feng, *ChemSusChem*, 2018, **11**, 2724-2729.
- [5] Q. Wang, K. Cui, J. Li, Y. Wu, Y. Yang, X. Zhou, G. Ma, Z. Yang, Z. Lei and S. Ren, *Nanoscale*, 2020, **12**, 9171-9177.
- [6] X. Zhang, Z. Luo, P. Yu, Y. Cai, Y. Du, D. Wu, S. Gao, C. Tan, Z. Li, M. Ren, T. Osipowicz, S. Chen, Z. Jiang, J. Li, Y. Huang, J. Yang, Y. Chen, C. Y. Ang, Y. Zhao, P. Wang, L. Song, X. Wu, Z. Liu, A. Borgna and H. Zhang, *Nat. Catal.*, 2018, **1**, 460-468.
- [7] S. Li, X. Jian, J. Liu, S. Guo, C. Zhou, P. Zhang, Y. Yang and L. Chen, *Int. J. Hydrogen Energy*, 2020, **45**, 4435-4443.
- [8] X. Ren, F. Yang, R. Chen, P. Ren and Y. Wang, *New J. Chem.*, 2020, **44**, 1493-1499.
- [9] L. Zhang, H. Yang, D. K. J. A. Wanigarathna and B. Liu, *Small Methods*, 2018, **2**, 1700353.
- [10] X. Huang, X. Xu, C. Li, D. Wu, D. Cheng and D. Cao, *Adv. Energy Mater.*, 2019, **9**, 1803970.
- [11] B. Chang, G. Zhao, Y. Shao, L. Zhang, B. Huang, Y. Wu and X. Hao, *J. Mater. Chem. A*, 2017, **5**, 18038-18043.
- [12] S. Gao, Y. Liu, G.-D. Li, Y. Guo, Y. Zou and X. Zou, *Electrochim. Acta*, 2016, **199**, 99-107.
- [13] R. Boppella, J. Tan, W. Yang and J. Moon, *Adv. Funct. Mater.*, 2018, **29**, 1807976.
- [14] Z. X. Cai, J. Na, J. Lin, A. A. Alshehri, K. A. Alzahrani, Y. G. Alghamdi, H. Lim, J. Zheng, W. Xia, Z. L. Wang and Y. Yamauchi, *Chem. Eur. J.*, 2020, **26**, 6195-6204.
- [15] H. Tian, X. Wang, H. Li, M. Pi, D. Zhang and S. Chen, *Energy Technol.*, 2019, **8**, 1900936.
